# Supplementary material
Source: Springer Nature journal article supplement (https://www.springermedizin.de/resource/supplementary/12943_2009_565_MOESM6_ESM.pdf/9554982)
Supplement: MOESM6 [file 9554982]

hZar2 -----MERFVRVPYGLYQG  
cZar2 -----MERLVRVPYGLYQG  
gZar2 -----MESFVFPFPGSFQG  
mZar2 -----  
rZar2 MVGANNQKNLTSFKTTAERSGYCGLRGRARSLWEDARGLQGAGRRNQLPTEVEPVAAVKG

hZar2 YGSTVPLGQPGLSGHKQPDWRQNMGPPTFLARPGLLV PANAP-----  
cZar2 YGNTVPLGHPGLSEHEQPDWRRNTGPPNFLARPGLLV PANAS-----  
gZar2 FRGGLTPNRS GELTPKQPSWKQSKS--SGLSPFPVGPPTPLS-----  
mZar2 -----  
rZar2 VEGLLREVRFPFHCTTTPERVPTTFGPTTPGPTDTLGLRPLTDGAASLLTLR KARALRR

hZar2 -----DYCIDPYKRAQLKAILSQMNPSLS PRLCKPNTKEVGVQVSPRVDKAVQCSLGP  
cZar2 -----HYCMDPYKRAQLKAILSQMNPSLSLQLYRANTREVGVQVSPRVDKSVQCSLGP  
gZar2 -----ADYLDSCRRAQLKALLSQMSPGLT PRLRRANTKEVGVQVNPRAAAVQCSLGP  
mZar2 -----MNPYNRAQLQAVSTQMDPNLSLWLRSVHTTEVGVQVSLRVDKSVQCSQGS  
rZar2 DVMTARRGRSASAARKAQLQVVPTQMNPNVSLCLHKANTKDVGIQVSLQVDKSVQCSLGS

hZar2 RTLSSCSPWDGRDPQEPLPACGVTS PATGRRGLIRLRRDGDEAESKALPGPAEASQPQ--  
cZar2 RTLCSRSPWGSAGHKAPLTANGVYSPVMGHRSLIQLQREGEDQERKALLHPTEASEQQQQ  
gZar2 RTLPASRPLT-----PAARARGRLALYSPLL NPLRFTLPEAAAHQEDEAA  
mZar2 QTLHSSSLSDRTSSRKP-----TEAWEVGRRALIRRPQDGEDEE-----SQEELTGPTAS  
rZar2 QTLHSSSLSDRTSSRKP-----TEAWRAGQRLIQLPQGGEDKK-----SPE-LTGTEAN

hZar2 ---PFSRRSGADRQEEPGQLEESGEKDAPCPQETKSKQVPGDAASEPLRRPNFQFLEPKY  
cZar2 QQPPMPRSEEDKQEEPHQHNELEEDASSPRKEKSKQAQGVGGADLLRKPTFFLEAKY  
gZar2 AAAAPEEQKAEGRSDEQRDGPAAEAAAPTEAPREQ-----GVAPGRRAAFQFLEQKY  
mZar2 QLLLPTWSRDREEQ--FPRLKELGEEYAHSPQDR-----RGKQFLELKY  
rZar2 QLVPPTRSQDDDKQDTLSQLKESGEAYAPSPQDR-----KSKQFLEPKY

Zinc Finger #1

hZar2 GYFHC**CKDCK**TRWESAYVWCISG**TNKVYFKQLCKCK**QKSFN**PYRVEA**I**QCQT**CSKSHC**S**CSP  
cZar2 GYFHC**CKDCK**TRWESAYVWCISG**TNKVYFKQLCKCK**QKSFN**PYRVEA**I**QCQT**CSKSCC**S**CSP  
gZar2 GYFHC**CKDCK**TRWESAYVWCISG**SNKVYFKQLCRK**CQKGFN**PYRVEA**I**QCQT**CFKTRC**S**CSP  
mZar2 GYFHC**CKDCK**RRWESAYVWCISG**TNKVYFKQLCNK**CQKSFN**PYRVEE**I**QCQT**CLRVCC**S**CS  
rZar2 GYFHC**CKDCK**TRWESAYVWCIT**GTNKVYFKQLCSK**CQKSFN**PYRVEA**I**QCQT**CLSSCC**S**CS

Zinc Finger #2

hZar2 QKRRHIDLR**PHRQELCGRC**KDKRFSCGNIYSFKY**VM**  
cZar2 QKRRHIDLR**PHRQDLCGRC**KDKRFSCGNTYSFKY**IM**  
gZar2 QKRRHIDLR**PHRQELCGRC**KGKRLSCDNTYSFKY**IY**  
mZar2 PKKRHIDVRR**PHRQELCGHC**KDKKFS**CVFSLK**---  
rZar2 QKRRHINLR**PHRQELCGHC**KDKK**FP**CVF**YSFK**---
